# Supplementary material
Source: PubMed Central journal article supplement (PMC2795798)
Supplement: NIHMS141654-supplement-1.pdf [file NIHMS141654-supplement-1.pdf]

Supplementary Table S1

**Mapping profile of BAC-array CGH within the 9p region in 8 breast cancer cell lines and 2 normal breast cell lines (MCF10A and MCF12A)**

| Clone       | Mb    | MCF10A | MCF12A | SUM44 | SUM52 | SUM149 | HCC38 | HCC1954 | HCC70 | HCC2157 | MDAMB436 |
|-------------|-------|--------|--------|-------|-------|--------|-------|---------|-------|---------|----------|
| CTB-41L13   | 0.22  | -0.36  | 0.11   | -1.00 | -0.17 | -0.26  | 0.91  | 0.82    | 0.81  | 1.45    | 0.53     |
| RP11-122A20 | 2.64  | -0.16  | 0.23   | -0.78 | -0.43 | -0.45  | 0.88  | 1.45    | 1.15  | 0.99    | 0.74     |
| RP11-280I16 | 4.41  | -0.12  | 0.40   | -0.68 | -0.18 | -0.22  | 0.93  | 1.66    | 0.94  | 0.96    | 0.51     |
| RP11-62H18  | 4.58  | 0.01   | 0.28   | -0.74 | 0.08  | -0.05  | 1.03  | 1.86    | 0.97  | 1.10    | 0.43     |
| RP11-125K10 | 4.82  | -0.11  | 0.17   | -0.57 | -0.17 | -0.16  | 0.95  | 1.67    | 1.06  | 0.98    | 0.49     |
| RP11-39K24  | 4.98  | -0.08  | 0.26   | -0.63 | -0.24 | -0.01  | 0.88  | 1.39    | 0.01  | 0.92    | 0.58     |
| CTD-2006L14 | 5.89  | -0.03  | 0.30   |       |       | 0.63   | 0.88  | 1.62    | 0.95  | 0.92    | 0.52     |
| RP11-165O14 | 5.96  | 0.05   | 0.34   | -0.61 | -0.15 | 0.77   | 0.99  | 1.69    | 1.18  | 0.95    | 0.43     |
| RP11-50C21  | 10.43 | 0.05   | 0.17   |       | -0.16 | 0.84   | 0.80  | 1.00    | 1.06  | 0.57    |          |
| RP11-264O11 | 10.58 | -0.22  | -0.04  | -0.75 | -0.37 | 0.82   | 0.82  | 1.52    | 1.08  | 0.93    | 0.01     |
| RP11-32D4   | 11.59 | -0.03  | 0.18   | -0.64 | 0.24  | 1.07   | 0.77  | 1.39    | NA    | 0.91    |          |
| RP11-58B8   | 11.64 | 0.10   | 0.17   | -0.64 | 0.20  | 1.04   | 0.69  | 1.23    | 0.85  | 0.73    | 0.21     |
| RP11-26K11  | 11.79 | -0.05  | 0.32   | -0.61 | 0.03  | 0.83   | 0.65  | 1.08    | NA    | 0.52    | 0.51     |
| RP11-117J18 | 12.63 | 0.07   | 0.48   | -0.60 | -0.43 | 0.53   | 0.58  | NA      | 0.87  | 0.28    | -0.11    |
| RP11-115I23 | 13.02 | 0.09   | 0.09   | -0.65 | 0.12  | 1.25   | 1.40  | 1.40    | 1.05  | 0.91    | -0.30    |
| RP11-132G20 | 15.86 | 0.06   | -0.06  | -0.60 | 0.00  | 0.97   | 0.50  | 1.29    | 0.85  | 0.74    |          |
| RP11-109M15 | 16.14 | -0.10  | 0.47   | -0.83 | -0.34 | 0.87   | 0.87  | 1.78    | 1.15  | 1.03    | -0.20    |
| RP11-163F8  | 17.49 | 0.08   |        | -0.57 | -0.21 | 0.77   | -0.20 | 1.22    | 1.01  | 0.72    | -0.66    |
| RP11-61D22  | 19.58 | 0.00   | -0.43  | -0.78 | -0.15 | 1.11   | -0.60 | -0.07   | 0.98  | 1.10    | -0.41    |
| RMC09P006   | 20.33 | -0.04  | -0.38  | -0.68 | -0.20 | 0.29   | -0.67 | -0.23   | -0.13 | 1.13    |          |
| RMC09P007   | 21.96 | -1.96  | -0.54  | -0.54 | -0.15 | -2.50  | -1.93 | 0.13    | 0.06  | 0.94    | -0.25    |
| CTB-65D18   | 21.96 | -1.64  | -0.53  | -0.65 | -0.17 | -2.46  | -1.08 | -0.20   | 1.01  | 0.94    | -0.28    |
| RP11-33O15  | 22.82 | -0.74  | -0.54  |       | 0.09  | -1.93  | -1.80 | -0.19   | 1.00  | 0.96    | -0.24    |
| RP11-85J5   | 24.52 | 0.01   | -0.54  | -0.69 | -0.03 | -2.01  | -1.68 | -0.23   | 0.85  | 0.77    | -0.32    |
| RP11-55P9   | 25.43 | -0.15  | -0.17  | -0.63 | -0.13 |        | -1.86 | -0.34   | 1.04  | 0.96    |          |
| RP11-57P14  | 27.10 | 0.03   |        | -0.69 | -0.16 | -0.97  | -3.38 | -0.41   | NA    | 1.17    | -0.52    |
| CTD-2170E19 | 27.29 | 0.08   | 0.24   | -0.79 | -0.18 | -0.84  |       | -0.26   | 0.91  | 1.12    |          |
| RP11-235F7  | 27.54 | 0.01   | 0.30   | -0.85 | -0.24 | -1.05  | -2.66 | -0.20   | 0.97  | 0.98    | -0.61    |
| RP11-18A21  | 30.77 | 0.06   | -0.03  | -0.62 | 0.05  | -0.87  | -1.74 | 0.00    | 0.93  | 0.92    | 0.09     |

GASC1 →

P16/CDKN2A →

The BAC clones in array-CGH are ordered by base-pair position. Red indicates log 2 ratios greater than or equal to 0.5 as genomic amplification (Ref. Neve et al. Cancer Cell 10: 515-27, 2006) GASC1 is located at 6.75Mb.

Supplementary Table S2

The top 20 genes up and down-regulated by GASC1

| Gene           | Fold  | Gene            | Fold   |
|----------------|-------|-----------------|--------|
| <i>SLC3A2</i>  | 12.10 | <i>TGFBI</i>    | -47.29 |
| <i>CALB2</i>   | 11.26 | <i>IGFBP6</i>   | -18.35 |
| <i>CDC14B</i>  | 9.52  | <i>RGC32</i>    | -13.36 |
| <i>KRT17</i>   | 9.13  | <i>ANXA8</i>    | -12.88 |
| <i>S100P</i>   | 8.89  | <i>MT1G</i>     | -10.24 |
| <i>CRYAB</i>   | 8.72  | <i>PLAC8</i>    | -9.82  |
| <i>KRT6A</i>   | 7.91  | <i>BASP1</i>    | -8.08  |
| <i>CPA4</i>    | 6.82  | <i>PTTG1</i>    | -6.93  |
| <i>DSG3</i>    | 6.14  | <i>PTMA</i>     | -6.89  |
| <i>KRT6C</i>   | 6.13  | <i>PBK</i>      | -6.53  |
| <i>PPM2C</i>   | 6.06  | <i>AURKB</i>    | -6.26  |
| <i>ID2</i>     | 5.69  | <i>CCNB1</i>    | -6.24  |
| <i>TCN1</i>    | 5.69  | <i>KIF20A</i>   | -6.14  |
| <i>HLA-B</i>   | 5.57  | <i>DLG7</i>     | -6.06  |
| <i>COX7A1</i>  | 5.39  | <i>TYMS</i>     | -6.01  |
| <i>AZGP1</i>   | 5.28  | <i>CLIC3</i>    | -5.99  |
| <i>CEACAM1</i> | 5.10  | <i>C22orf18</i> | -5.99  |
| <i>NOTCH1</i>  | 5.06  | <i>CDC2</i>     | -5.87  |
| <i>CA2</i>     | 4.97  | <i>NMU</i>      | -5.86  |
| <i>LEMD1</i>   | 4.93  | <i>FOS</i>      | -5.74  |
