# Supplementary material
Source: PubMed Central journal article supplement (PMC2795798)

# Supplementary Figure S1

Finak *et al.*

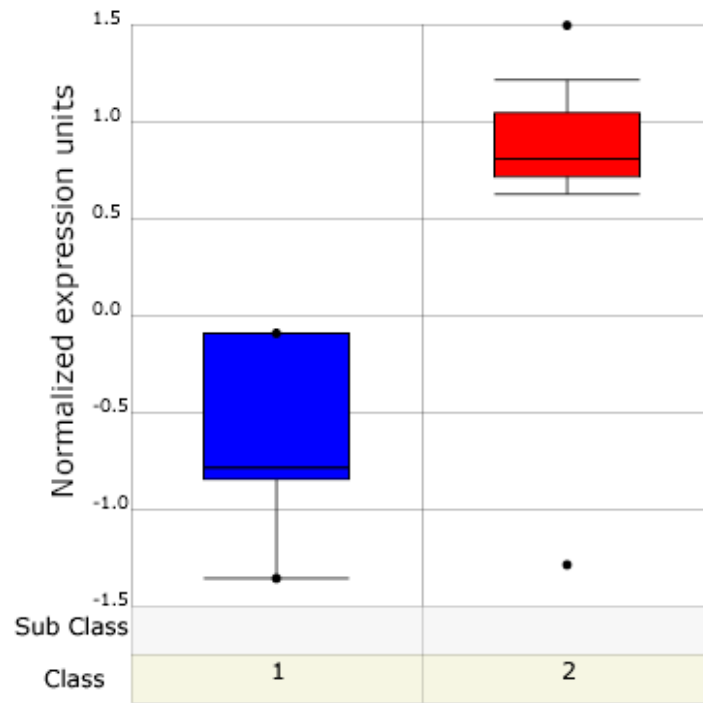

Karnoub *et al.*

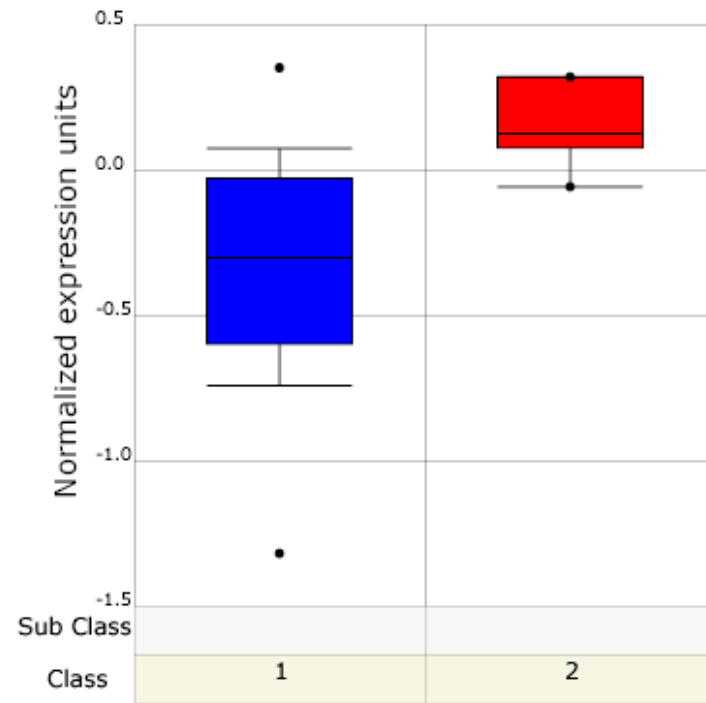

Supplementary Figure S2

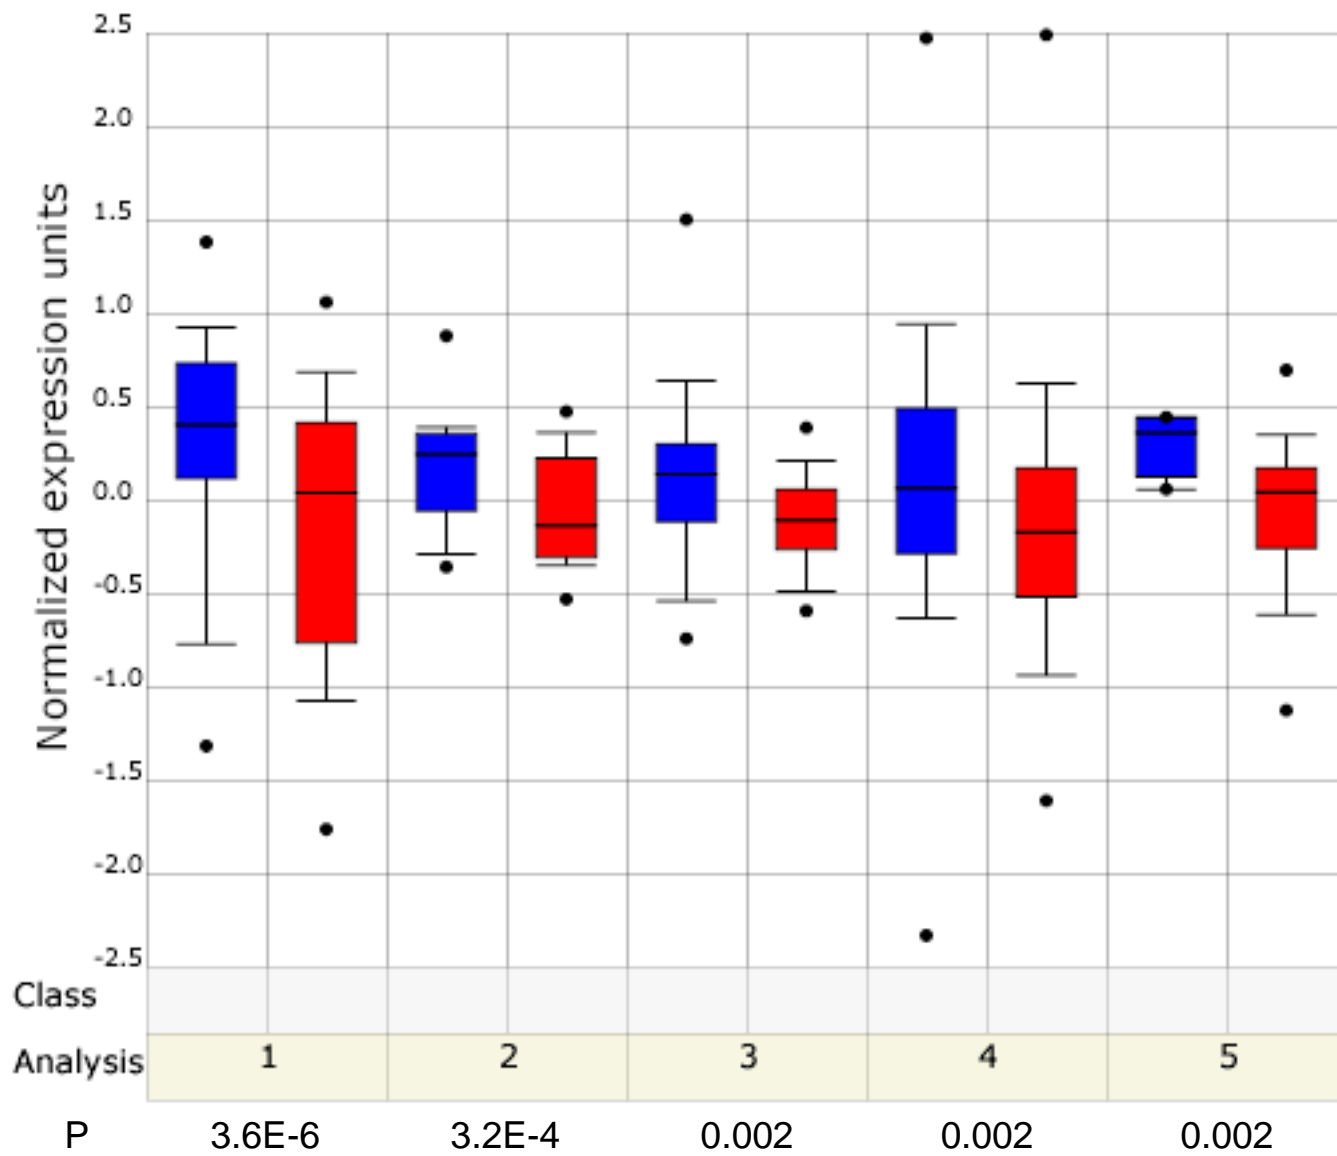

Supplementary Figure S3

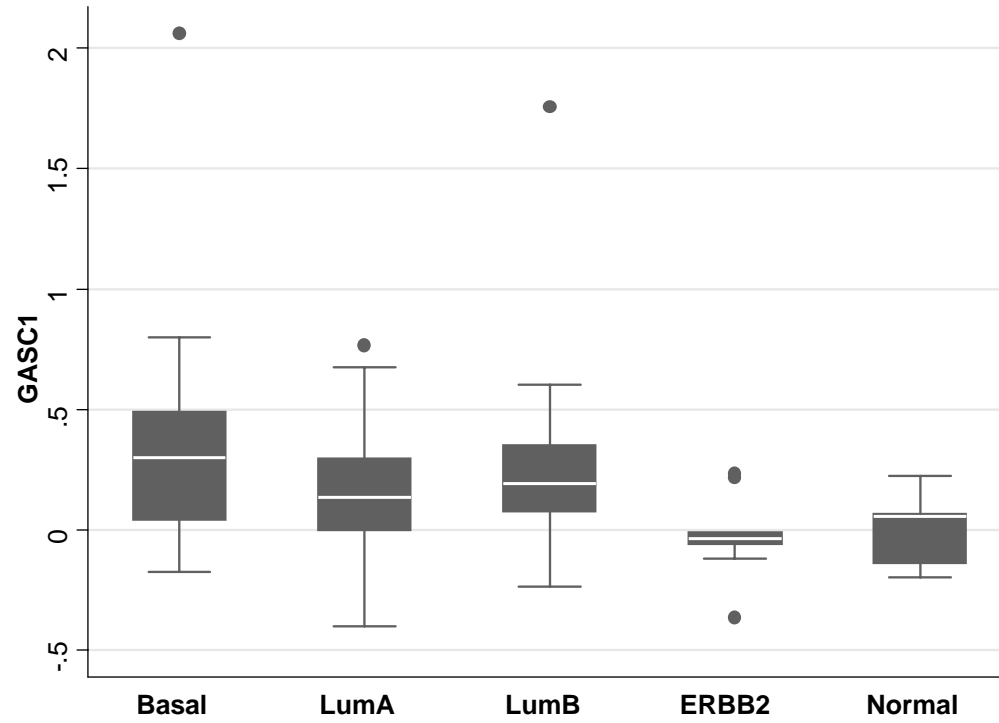

Supplementary Figure S4

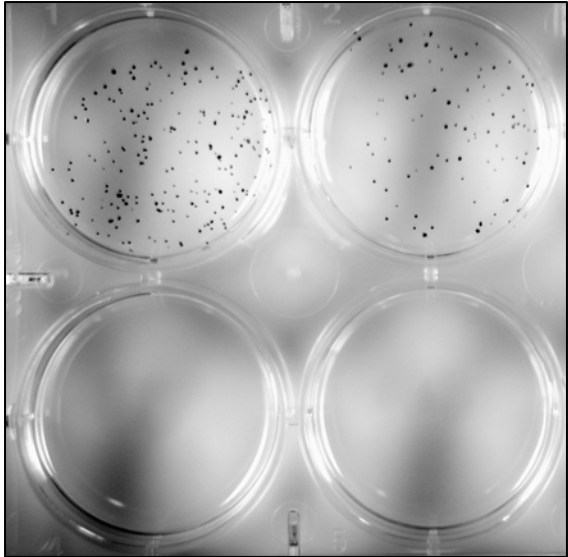

MCF10A-GASC1

MCF10A-control vector

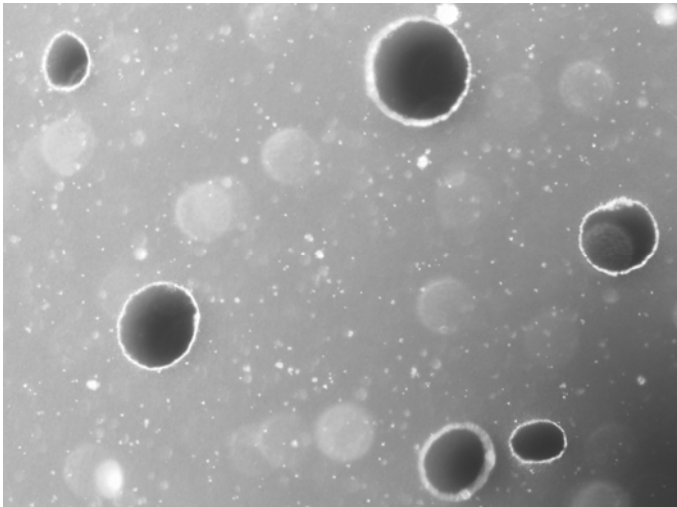

MCF10A-GASC1

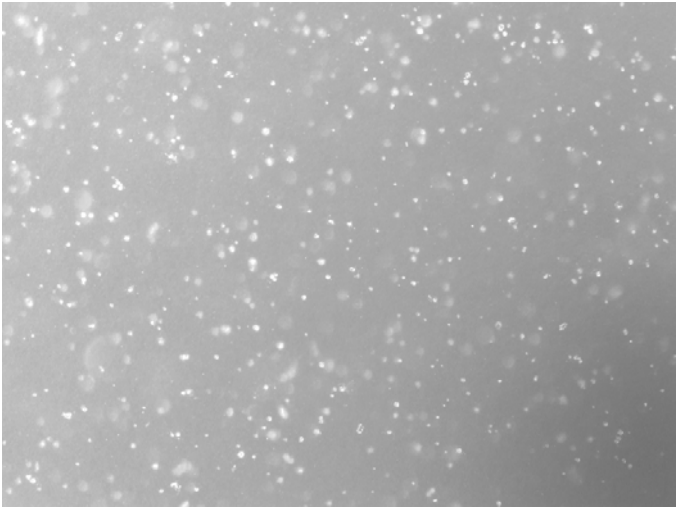

MCF10A-control vector

Supplementary Figure S5

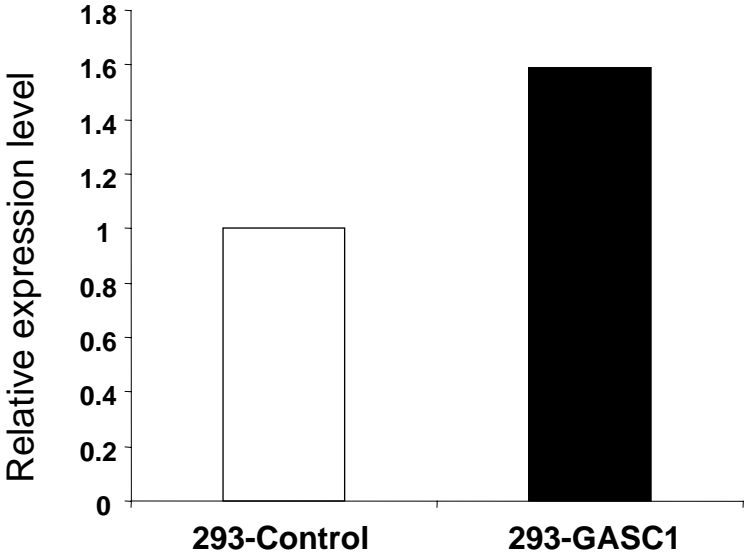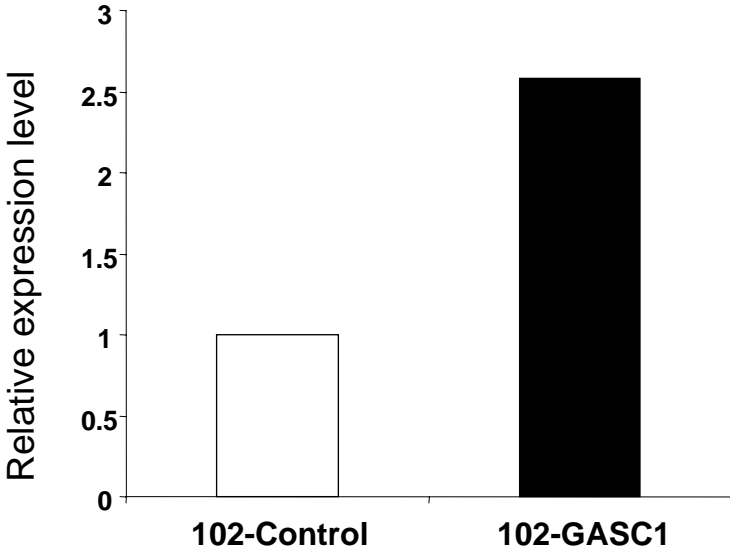

# Supplementary Figure S6

## Control cells

## GASC1 amplified cells

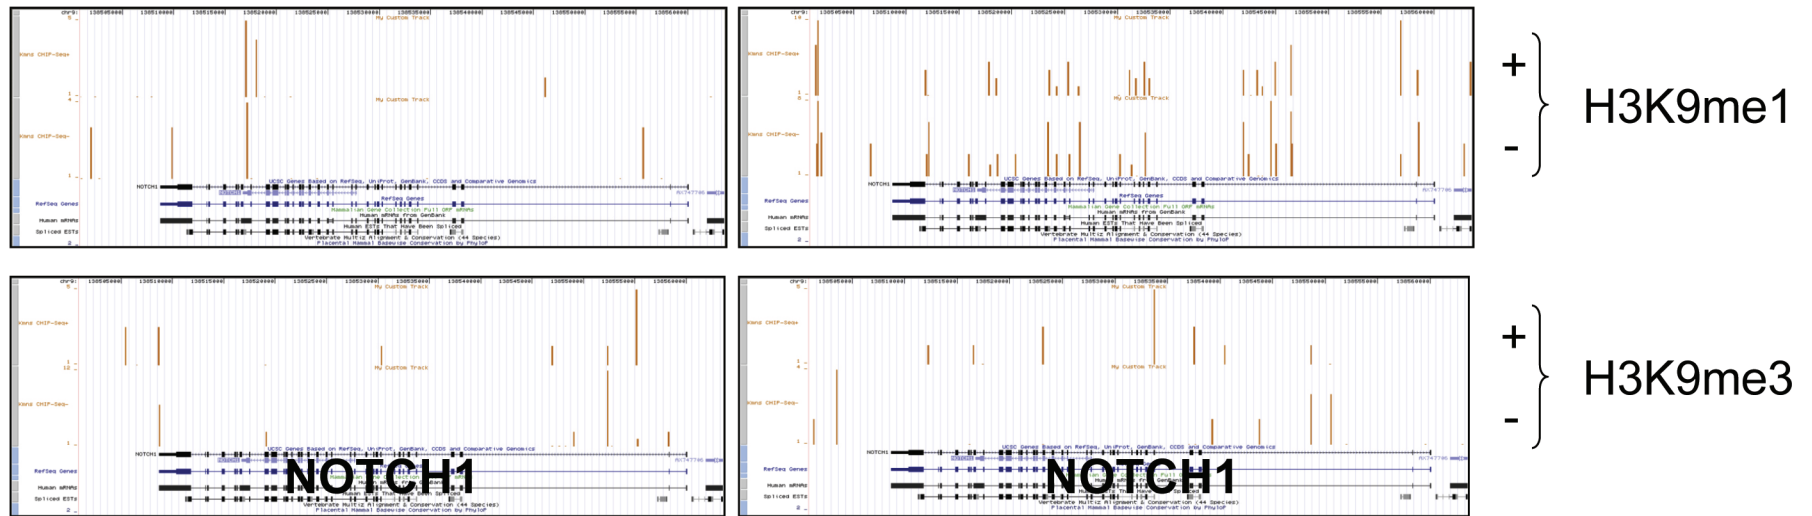

Supplementary Figure S7

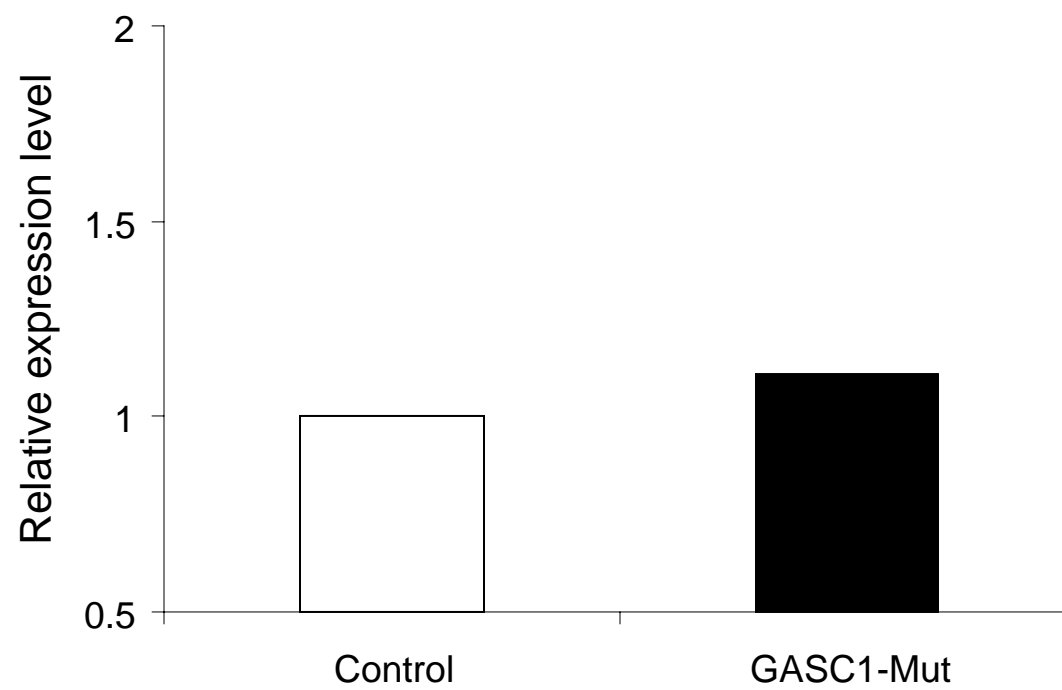

## Supplementary Figure S8

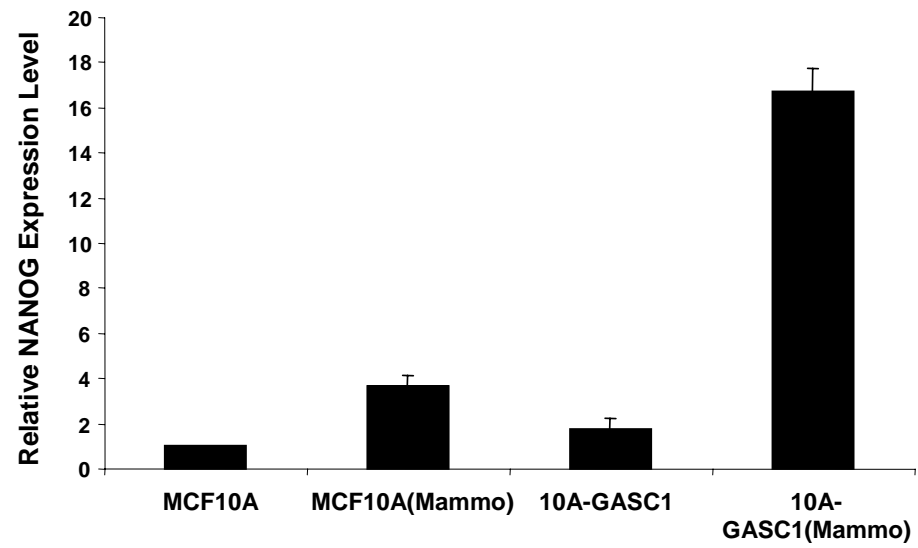

Supplement: NIHMS141654-supplement-3.pdf [file NIHMS141654-supplement-3.pdf]
